# Supplementary material
Source: PubMed Central journal article supplement (PMC2527977)
Supplement: supp_7_3_327__1.pdf [file supp_7_3_327__1.pdf]

| Element                             | Weight | Excellent (9-10 pts)                                                                                                                                                    | Good (7-8 pts)                                                                                                                                                     |
|-------------------------------------|--------|-------------------------------------------------------------------------------------------------------------------------------------------------------------------------|--------------------------------------------------------------------------------------------------------------------------------------------------------------------|
| <b>Introduction</b>                 | 0.15   | General overview provides outstanding context for research.                                                                                                             | General overview provides good context for research.                                                                                                               |
| <b>Research Question</b>            | 0.2    | Questions are insightful, descriptive, and written so that comparative relationships between experimental variables are clearly understood.                             | Questions are mostly descriptive, and written so that comparative relationships between experimental variables are mostly clearly understood.                      |
| <b>Hypotheses</b>                   | 0.2    | Null and alternative hypotheses thoroughly describe baseline and treatment conditions and clearly illustrate relationships between independent and dependent variables. | Null and alternative hypotheses mostly describe baseline and treatment conditions and mostly illustrate relationships between independent and dependent variables. |
| <b>Predictions</b>                  | 0.2    | Predictions are highly specific and tightly connected with research questions and hypotheses.                                                                           | Predictions are mostly specific and well connected with research questions and hypotheses.                                                                         |
| <b>Experimental Design</b>          | 0.2    | Materials and methods are clear and complete. Design and rationale for experimental approach are well supported.                                                        | Materials and methods are mostly clear and complete. Design and rationale for experimental approach are mostly supported.                                          |
| <b>Format, Spelling and Grammar</b> | 0.05   | Formatting, spelling, and grammar are excellent with no errors.                                                                                                         | Formatting, spelling, and grammar are good with almost no errors.                                                                                                  |

---

**Proficient (5-6 pts)**

General overview provides reasonably good context for research.

Questions are reasonably descriptive, and written so that comparative relationships between experimental variables are

somewhat understood

Null and alternative hypotheses somewhat

describe baseline and treatment conditions and reasonably illustrate

relationships between independent and dependent variables

Predictions are reasonably specific and somewhat connected with research questions and hypotheses.

Materials and methods are somewhat complete. Design and rationale for experimental approach are reasonably supported.

Formatting, spelling, and grammar are reasonably good with few errors.

**Partially Proficient (3-4 pts)**

General overview provides somewhat insufficient context for research.

Questions are lack descriptiveness, and written so that comparative relationships between experimental variables are incompletely understood.

Null and alternative hypotheses somewhat unclear describe baseline and treatment conditions and incompletely illustrate relationships between independent and dependent variables.

Predictions are somewhat unspecific and incompletely connected with research questions and hypotheses.

Materials and methods are somewhat unclear and incomplete.

Design and rationale for experimental approach are incompletely supported.

Formatting, spelling, and grammar are substandard with somewhat frequent errors.

**Incomplete or Absent (1-2 pts)**

General overview is insufficient or is absent.

Questions are not described or are written so that comparative relationships between experimental variables are not understood.

Null and alternative hypotheses clearly describe baseline and treatment conditions and clearly illustrate relationships between independent and dependent variables.

Predictions are not connected with research questions and hypotheses or are absent.

Materials and methods are unclear or absent. Design and rationale for experimental approach are unsupported.

Formatting, spelling, and grammar are unacceptable with frequent errors.

---
